# Supplementary material for: Identifying Optimal Models to Represent Biochemical Systems
Source: PubMed Central journal article supplement (PMC3885518; doi:10.1371/journal.pone.0083664), 2014-01-08
Supplement: pone.0083664.s007.pdf [file pone.0083664.s007.pdf]

Table S1: Parameter values of the full and optimal models in the last iteration. Here the average deviation at each point between the optimal and the full model is less than 25%. Model 1 refers to EGFR model without constraint to prevent the pathway to Ras protein whereas Model 2 refers to EGFR model with the constraint.

| Parameter | Model 1                |                       | Model 2                |                        |
|-----------|------------------------|-----------------------|------------------------|------------------------|
|           | $k_f^6$                | $k_r^6$               | $k_f^7$                | $k_r^7$                |
| $k_1$     | $3.1 \times 10^{-3}$   | $2.8 \times 10^{-3}$  | $3 \times 10^{-3}$     | $2.7 \times 10^{-3}$   |
| $k_{-1}$  | $5.77 \times 10^{-2}$  | $5.31 \times 10^{-2}$ | $5.84 \times 10^{-2}$  | $5.09 \times 10^{-2}$  |
| $k_2$     | $9.5 \times 10^{-3}$   | $9.9 \times 10^{-3}$  | $9.6 \times 10^{-3}$   | $9.8 \times 10^{-3}$   |
| $k_{-2}$  | 0.1336                 | $9.24 \times 10^{-2}$ | $8.22 \times 10^{-2}$  | 0.1087                 |
| $k_3$     | 1.0679                 | 0.79                  | 0.9481                 | 1.0264                 |
| $k_{-3}$  | 0.0194                 | 0                     | 0.016                  | 0                      |
| $V_4$     | 450.0001               | 477.8907              | 440.9235               | 437.1619               |
| $K_4$     | 49.9990                | 48.2002               | 51.0252                | 46.1166                |
| $k_5$     | $6.57 \times 10^{-2}$  | $5.95 \times 10^{-2}$ | $6.4 \times 10^{-2}$   | $5.1 \times 10^{-2}$   |
| $k_{-5}$  | 0.1917                 | 0                     | 0.3116                 | 0                      |
| $k_6$     | 0.9992                 | 1.0237                | 0.9264                 | 0.8975                 |
| $k_{-6}$  | $4.41 \times 10^{-2}$  | 0                     | $4.04 \times 10^{-2}$  | 0                      |
| $k_7$     | 0.3079                 | 0.2803                | 0.3053                 | 0.2852                 |
| $k_{-7}$  | $4 \times 10^{-3}$     | $7.4 \times 10^{-3}$  | $5 \times 10^{-3}$     | $4.6 \times 10^{-3}$   |
| $V_8$     | 0.9894                 | 0                     | 0.7757                 | 0                      |
| $K_8$     | 100                    | 112.7967              | 101.4729               | 97.2425                |
| $k_9$     | $4.2 \times 10^{-3}$   | $4.4 \times 10^{-3}$  | $2.8 \times 10^{-3}$   | $2.7 \times 10^{-3}$   |
| $k_{-9}$  | $7.95 \times 10^{-2}$  | $4.03 \times 10^{-2}$ | $4.45 \times 10^{-2}$  | $3.19 \times 10^{-2}$  |
| $k_{10}$  | $5.8 \times 10^{-3}$   | 0                     | $4.9 \times 10^{-3}$   | 0                      |
| $k_{-10}$ | $5.26 \times 10^{-2}$  | 0                     | $4.05 \times 10^{-2}$  | 0                      |
| $k_{11}$  | $7.68 \times 10^{-2}$  | 0                     | $9.18 \times 10^{-2}$  | 0                      |
| $k_{-11}$ | $1.66 \times 10^{-2}$  | 0                     | $1.64 \times 10^{-2}$  | 0                      |
| $k_{12}$  | $1.73 \times 10^{-2}$  | 0                     | $7.5 \times 10^{-3}$   | 0                      |
| $k_{-12}$ | $1.073 \times 10^{-4}$ | 0                     | $5.07 \times 10^{-5}$  | 0                      |
| $k_{13}$  | $9.48 \times 10^{-2}$  | 0.1036                | $8.49 \times 10^{-2}$  | $8.39 \times 10^{-2}$  |
| $k_{-13}$ | 0.6009                 | 0                     | 0.6059                 | 0                      |
| $k_{14}$  | 5.9984                 | $1 \times 10^4$       | 5.3676                 | $1 \times 10^4$        |
| $k_{-14}$ | $5.63 \times 10^{-2}$  | 0                     | $9.71 \times 10^{-2}$  | 0                      |
| $k_{15}$  | 0.3346                 | 0.2904                | 0.3024                 | 0.2903                 |
| $k_{-15}$ | $1 \times 10^{-3}$     | $2.6 \times 10^{-3}$  | $1.6 \times 10^{-3}$   | $1.1 \times 10^{-3}$   |
| $K_{16}$  | 1.6962                 | 1.9833                | 1.7624                 | 1.6462                 |
| $V_{16}$  | 340                    | 330.3266              | 324.2768               | 327.9718               |
| $k_{17}$  | $2.9 \times 10^{-3}$   | $2.8 \times 10^{-3}$  | $3.4 \times 10^{-3}$   | $2.7 \times 10^{-3}$   |
| $k_{-17}$ | 0.1043                 | 0                     | $8.53 \times 10^{-2}$  | 0                      |
| $k_{18}$  | 0.2973                 | 0.2272                | 0.2962                 | 0.2016                 |
| $k_{-18}$ | $4 \times 10^{-4}$     | $1.6 \times 10^{-3}$  | $2.54 \times 10^{-5}$  | 0                      |
| $k_{19}$  | $1.83 \times 10^{-2}$  | 0                     | $1.65 \times 10^{-2}$  | 0                      |
| $k_{-19}$ | $2.25 \times 10^{-2}$  | 0                     | 0.1027                 | 0                      |
| $k_{20}$  | 0.1235                 | 0                     | 0.1159                 | 0.1928                 |
| $k_{-20}$ | $8.496 \times 10^{-4}$ | 0                     | $2.596 \times 10^{-4}$ | $6.813 \times 10^{-4}$ |
| $k_{21}$  | $2.7 \times 10^{-3}$   | $3.1 \times 10^{-3}$  | $2.8 \times 10^{-3}$   | $2.4 \times 10^{-3}$   |
| $k_{-21}$ | $9.84 \times 10^{-2}$  | $3.54 \times 10^{-2}$ | $9.72 \times 10^{-2}$  | $7.51 \times 10^{-2}$  |
| $k_{22}$  | $2.95 \times 10^{-2}$  | 0                     | $7.48 \times 10^{-2}$  | $9.6 \times 10^{-3}$   |
| $k_{-22}$ | $5.35 \times 10^{-2}$  | 0                     | $1.38 \times 10^{-2}$  | 0.1298                 |
| $k_{23}$  | $9.66 \times 10^{-2}$  | 0                     | 0.1307                 | 0                      |
| $k_{-23}$ | $2.99 \times 10^{-2}$  | 0                     | $4.13 \times 10^{-2}$  | 0                      |
| $k_{24}$  | $1.24 \times 10^{-2}$  | 0                     | $1.41 \times 10^{-2}$  | 0                      |
| $k_{-24}$ | $4.86 \times 10^{-2}$  | 0                     | $8.14 \times 10^{-2}$  | 0                      |

Continued on next page

Table S1 – *Continued from previous page*

| Parameter | Model 1               |                       | Model 2               |                       |
|-----------|-----------------------|-----------------------|-----------------------|-----------------------|
|           | $k_f^6$               | $k_r^6$               | $k_f^7$               | $k_r^7$               |
| $k_{25}$  | 1.0068                | 1.1123                | 0.9916                | 1.0597                |
| $k_{-25}$ | $3.36 \times 10^{-2}$ | $3.41 \times 10^{-2}$ | $3.12 \times 10^{-2}$ | $3.43 \times 10^{-2}$ |
