# Supplementary material for: Identifying Optimal Models to Represent Biochemical Systems
Source: PubMed Central journal article supplement (PMC3885518; doi:10.1371/journal.pone.0083664), 2014-01-08
Supplement: pone.0083664.s008.pdf [file pone.0083664.s008.pdf]

Table S2: List of experiments to obtain optimal model in Model 1.

| Experiment index | Experimental condition (e)      |                        |                       |                        |
|------------------|---------------------------------|------------------------|-----------------------|------------------------|
|                  | EGF <sub>stimulation</sub> (nM) | EGFR <sub>0</sub> (nM) | Shc <sub>0</sub> (nM) | Grb2 <sub>0</sub> (nM) |
| 1a               | 20                              | 100                    | 150                   | 85                     |
| 1b               | 2                               | 100                    | 150                   | 85                     |
| 2                | 15.3824                         | 141                    | 340                   | 0                      |
| 3                | 0.0746                          | 2.5771                 | 156.2478              | 10.4315                |
| 4                | 6.5245                          | 26.4265                | 0.7839                | 0.5163                 |
| 5                | 0.0118                          | 400                    | 6.2924                | 150                    |
| 6                | 19.9934                         | 399.9985               | 0.0506                | 150                    |
