# Supplementary material for: Identifying Optimal Models to Represent Biochemical Systems
Source: PubMed Central journal article supplement (PMC3885518; doi:10.1371/journal.pone.0083664), 2014-01-08
Supplement: pone.0083664.s009.pdf [file pone.0083664.s009.pdf]

Table S3: List of experiments to obtain optimal model in Model 2.

| Experiment index | Experimental condition (e)      |                        |                       |                        |
|------------------|---------------------------------|------------------------|-----------------------|------------------------|
|                  | EGF <sub>stimulation</sub> (nM) | EGFR <sub>0</sub> (nM) | Shc <sub>0</sub> (nM) | Grb2 <sub>0</sub> (nM) |
| 1a               | 20                              | 100                    | 150                   | 85                     |
| 1b               | 2                               | 100                    | 150                   | 85                     |
| 2                | 20                              | 400                    | 340                   | 0                      |
| 3                | 0.0653                          | 2.1885                 | 0                     | 11.3049                |
| 4                | 0.0936                          | 3.1826                 | 340                   | 150                    |
| 5                | 20                              | 0.4287                 | 107.2116              | 149.9955               |
| 6                | 20                              | 400                    | 0.7385                | 0.8746                 |
| 7                | 20                              | 239.0186               | 0.1460                | 149.9980               |
